# Supplementary material
Source: PubMed Central journal article supplement (PMC2077041)
Supplement: pnas_0708280104_8.pdf [file pnas_0708280104_8.pdf]

**Table 2. Median and mode estimates of all demographic parameters of the best models under each evolutionary scenario**

| Parameters          | $R^2$ | Median   | Mode     | 95% HPD           |
|---------------------|-------|----------|----------|-------------------|
| <b>AFREG Model</b>  |       |          |          |                   |
| $N_{AF}^*$          | 0.69  | 206,920  | 146,238  | 23,535 – 801,895  |
| $N_{AS}^*$          | 0.67  | 20,262   | 11,654   | 1938 – 62,726     |
| $N_{AM}^*$          | 0.47  | 5606     | 507      | 757 – 13,740      |
| $N_{A-AF}$          | 0.50  | 12,772   | 12,363   | 6,604 – 20,211    |
| $Nb_{AM}$           | 0.44  | 452      | 316      | 71 - 1280         |
| $Nb_{AS}$           | 0.42  | 462      | 357      | 64 - 1224         |
| $Nb_{MH}$           | 0.69  | 600      | 417      | 76 – 1,620        |
| $T_{AM}$            | 0.21  | 10,280   | 9,330    | 7,647- 15,945     |
| $T_{AS}$            | 0.24  | 51,102   | 46,229   | 40,135 – 70,937   |
| $T_{MH}$            | 0.05  | 141,455  | 138,747  | 103,535 – 185,642 |
| <b>ASEG Model</b>   |       |          |          |                   |
| $N_{AF}^*$          | 0.67  | 178,345  | 115,695  | 15,182 – 657,970  |
| $N_{AS}^*$          | 0.62  | 19,447   | 11,514   | 1810 – 59,041     |
| $N_{AM}^*$          | 0.43  | 7,003    | 514      | 759 – 17,919      |
| $N_{A-AF}$          | 0.55  | 10,688   | 10,586   | 4,943 – 17,182    |
| $N_{A-AS}$          | 0.04  | 364      | 198      | 52 – 1,799        |
| $Nb_{AM}$           | 0.45  | 474      | 335      | 65 – 1,340        |
| $Nb_{AS}$           | 0.35  | 467      | 340      | 71 – 1,241        |
| $Nb_{MH}$           | 0.23  | 967      | 593      | 185 – 2,032       |
| $Nb_{A-AS}$         | 0.03  | 143      | 76       | 2 - 719           |
| $T_{AM}$            | 0.21  | 10,228   | 9,240    | 7,561 – 16,168    |
| $T_{AS}$            | 0.06  | 51,848   | 46,398   | 40,290 – 74,326   |
| $T_{MH}$            | 0.06  | 128,936  | 121,286  | 101,165 – 169,786 |
| $T_{A-AS}$          | 0.01  | 843,445  | 818,255  | 800,255 – 939,033 |
| ADM                 | 0.67  | 0.007127 | 0.003566 | 0.00006 -0.023268 |
| <b>MREBIG Model</b> |       |          |          |                   |
| $N_{AF}$            | 0.57  | 42,262   | 29,368   | 4,827 – 174,384   |
| $N_{AS}$            | 0.78  | 4,104    | 4,323    | 959 – 6,625       |

| Parameters   | $R^2$ | Median  | Mode    | 95% HPD           |
|--------------|-------|---------|---------|-------------------|
| $N_{AM}$     | 0.57  | 1,185   | 993     | 532 – 2,232       |
| $N_{A-AF}^*$ | 0.18  | 561     | 248     | 53 – 3,068        |
| $N_{A-AS}$   | 0.05  | 320     | 149     | 52 – 1,504        |
| $Nb_{AM}$    | 0.24  | 383     | 218     | 18 – 1,326        |
| $Nb_{MH}$    | 0.13  | 201     | 101     | 2 – 776           |
| $Nb_{A-AS}$  | 0.03  | 151     | 76      | 2 – 1,125         |
| $^1NM_1$     | 0.34  | 0.694   | 0.000   | 0.060 – 111.341   |
| $^2NM_2$     | 0.56  | 0.834   | 0.908   | 0.003 – 1.639     |
| $^3NM_2^*$   | 0.42  | 0.074   | 0.030   | 0.001 – 0.357     |
| $^4NM_3$     | 0.16  | 0.021   | 0.000   | 0.002 – 0.357     |
| $^5NM_4$     | 0.06  | 0.014   | 0.000   | 0.002 – 0.286     |
| $T_{AM}$     | 0.19  | 10,375  | 7,541   | 7,541 – 15,924    |
| $T_{AS}^*$   | 0.03  | 58,704  | 46,092  | 40,059 – 87,244   |
| $T_{MH}^*$   | 0.12  | 99,926  | 97,900  | 55,184 – 146,197  |
| $T_{A-AS}$   | 0.01  | 862,590 | 820,578 | 800,388 – 959,283 |

Parameters labels according to SI Fig. 6 and SI Table 7, except when indicated. Population size units are effective number of diploid individuals, times are in yr, assuming 25yr per generation. Parameters not presented in SI Table 7 includes  $^1NM_1$ :  $N_{AF} \times M_1$ ;  $^2NM_2$ :  $N_{AS} \times M_2$ ;  $^3NM_2^*$ :  $N_{A-AS} \times M_2$ ;  $^4NM_3$ :  $N_{A-AF} \times M_3$ ;  $^5NM_4$ :  $N_{A-AS} \times M_4$ . Additionally, for each parameter we report its multiple determination coefficient  $R^2$  by summary statistics, as previous studies have shown that parameters with  $R^2 > 0.10$  can be reasonably well estimated [Neuenschwander, S. (2006) PhD thesis (Univof Berne, Berne, Switzerland)].
