# Supplementary material
Source: PubMed Central journal article supplement (PMC2077041)
Supplement: pnas_0708280104_9.pdf [file pnas_0708280104_9.pdf]

**Table 3. Distribution of simulated TMRCA, in years, for autosomal loci under each scenario simulated on the basis of median estimates**

|                                          | Model     |           |           |
|------------------------------------------|-----------|-----------|-----------|
|                                          | AFREG     | ASEG      | MREBIG    |
| Quantiles for the TMRCA distribution     |           |           |           |
| 0.00                                     | 103,525   | 102,675   | 133,500   |
| 0.05                                     | 135,950   | 207,586   | 429,200   |
| 0.10                                     | 140,175   | 283,550   | 540,300   |
| 0.15                                     | 185,696   | 343,859   | 643,325   |
| 0.20                                     | 249,775   | 397,745   | 742,800   |
| 0.25                                     | 310,244   | 449,575   | 845,650   |
| 0.30                                     | 369,975   | 500,275   | 864,300   |
| 0.35                                     | 430,000   | 551,900   | 866,425   |
| 0.40                                     | 492,250   | 605,650   | 868,725   |
| 0.45                                     | 556,739   | 661,050   | 871,200   |
| 0.50                                     | 626,200   | 721,175   | 873,875   |
| 0.55                                     | 699,875   | 785,775   | 876,900   |
| 0.60                                     | 782,100   | 857,310   | 880,225   |
| 0.65                                     | 873,400   | 933,725   | 883,975   |
| 0.70                                     | 975,775   | 1,020,908 | 888,300   |
| 0.75                                     | 1,095,000 | 1,121,425 | 893,475   |
| 0.80                                     | 1,242,105 | 1,242,280 | 899,725   |
| 0.85                                     | 1,428,979 | 1,397,750 | 907,850   |
| 0.90                                     | 1,689,533 | 1,620,278 | 919,275   |
| 0.95                                     | 2,143,954 | 1,991,964 | 938,850   |
| 1.00                                     | 7,870,725 | 6,685,300 | 1,189,675 |
|                                          |           |           |           |
| Average TMRCA over all loci              | 807,262   | 862,251   | 813,530   |
|                                          |           |           |           |
| Loci where MRCA is located in Africa, %  | 100       | 100       | 82.1      |
| Loci where MRCA is located in Asia, %    | 0         | 0         | 17.9      |
| Loci where MRCA is located in America, % | 0         | 0         | 0         |

Model labels are as in Fig. 1
