# Supplementary material
Source: PubMed Central journal article supplement (PMC2077041)
Supplement: pnas_0708280104_10.pdf [file pnas_0708280104_10.pdf]

**Table 4. Distribution of simulated continent specific TMRCA, in years, for autosomal loci, based on the median estimates of the best scenario (AFREG)**

|                                          | Continent |           |            |
|------------------------------------------|-----------|-----------|------------|
|                                          | Africa    | Asia      | Americas   |
| Quantiles for the TMRCA distribution     |           |           |            |
| 0.00                                     | 106,750   | 35,100    | 16,775     |
| 0.05                                     | 135,350   | 91,050    | 50,425     |
| 0.10                                     | 139,650   | 110,525   | 95,550     |
| 0.15                                     | 174,521   | 119,400   | 110,250    |
| 0.20                                     | 238,400   | 125,250   | 118,400    |
| 0.25                                     | 300,000   | 129,725   | 124,250    |
| 0.30                                     | 360,250   | 133,425   | 128,850    |
| 0.35                                     | 421,550   | 136,675   | 132,725    |
| 0.40                                     | 482,825   | 139,650   | 136,150    |
| 0.45                                     | 548,864   | 169,125   | 139,275    |
| 0.50                                     | 617,625   | 237,463   | 164,475    |
| 0.55                                     | 690,650   | 311,725   | 238,825    |
| 0.60                                     | 771,935   | 394,000   | 319,425    |
| 0.65                                     | 861,450   | 484,775   | 410,800    |
| 0.70                                     | 962,158   | 586,958   | 512,975    |
| 0.75                                     | 1,080,225 | 706,800   | 632,656    |
| 0.80                                     | 1,226,105 | 850,980   | 777,010    |
| 0.85                                     | 1,411,629 | 1,035,650 | 965,600    |
| 0.90                                     | 1,676,175 | 1,296,800 | 1,225,953  |
| 0.95                                     | 2,115,976 | 1,743,228 | 1,671,175  |
| 1.00                                     | 8,767,125 | 7,276,725 | 10,801,825 |
| Average TMRCA over all loci              | 796,583   | 514,248   | 470,070    |
| Loci where MRCA is located in Africa, %  | 100       | 97.3      | 94.1       |
| Loci where MRCA is located in Asia, %    | 0         | 2.7       | 5.9        |
| Loci where MRCA is located in America, % | 0         | 0         | 0          |
