# Supplementary material
Source: PubMed Central journal article supplement (PMC2077041)
Supplement: pnas_0708280104_11.pdf [file pnas_0708280104_11.pdf]

**Table 5. Distribution of simulated TMRCA, in years, for uniparentally inherited loci under each scenario based on the median estimates**

|                                          | Model     |           |         |
|------------------------------------------|-----------|-----------|---------|
|                                          | AFREG     | ASEG      | MREBIG  |
| Quantiles for the TMRCA distribution     |           |           |         |
| 0.00                                     | 75,625    | 69,525    | 78,775  |
| 0.05                                     | 103,500   | 101,125   | 229,549 |
| 0.10                                     | 107,575   | 105,325   | 311,150 |
| 0.15                                     | 110,400   | 108,225   | 394,671 |
| 0.20                                     | 112,700   | 110,600   | 483,725 |
| 0.25                                     | 114,725   | 112,675   | 577,894 |
| 0.30                                     | 116,550   | 114,525   | 680,343 |
| 0.35                                     | 118,275   | 116,225   | 788,825 |
| 0.40                                     | 119,900   | 117,900   | 862,800 |
| 0.45                                     | 121,500   | 119,550   | 863,425 |
| 0.50                                     | 123,075   | 121,150   | 864,100 |
| 0.55                                     | 124,700   | 122,825   | 864,825 |
| 0.60                                     | 126,325   | 124,475   | 865,650 |
| 0.65                                     | 128,025   | 126,200   | 866,600 |
| 0.70                                     | 129,800   | 128,200   | 867,675 |
| 0.75                                     | 131,750   | 146,575   | 868,950 |
| 0.80                                     | 133,875   | 177,950   | 870,500 |
| 0.85                                     | 136,375   | 218,354   | 872,500 |
| 0.90                                     | 139,450   | 277,200   | 875,350 |
| 0.95                                     | 207,925   | 383,300   | 880,225 |
| 1.00                                     | 1,912,125 | 1,944,725 | 962,025 |
| Average TMRCA over all loci              | 135,107   | 163,686   | 720,658 |
| Loci where MRCA is located in Africa, %  | 100       | 100       | 75.0    |
| Loci where MRCA is located in Asia, %    | 0         | 0         | 25.0    |
| Loci where MRCA is located in America, % | 0         | 0         | 0       |

Model labels are as in Fig. 1.
