# Supplementary material
Source: PubMed Central journal article supplement (PMC2077041)
Supplement: pnas_0708280104_12.pdf [file pnas_0708280104_12.pdf]

**Table 6. Evolutionary model and mutation rate estimated for each locus**

| Locus  | Evolutionary model | Mutation rate (per site per yr) |
|--------|--------------------|---------------------------------|
| T2557  | TIM + I            | $1.34 \times 10^{-9}$           |
| T2191  | GTR + I            | $1.83 \times 10^{-9}$           |
| T2568  | HKY                | $6.84 \times 10^{-10}$          |
| T1636  | K81uf + I          | $2.60 \times 10^{-9}$           |
| T2020  | HKY                | $1.20 \times 10^{-9}$           |
| T1584  | TVM                | $1.75 \times 10^{-9}$           |
| T2019  | HKY                | $9.18 \times 10^{-10}$          |
| T2986  | HKY                | $9.22 \times 10^{-10}$          |
| T953   | K81uf + I          | $5.17 \times 10^{-10}$          |
| T2021  | TrN                | $1.61 \times 10^{-9}$           |
| T2472  | TVM + I            | $1.21 \times 10^{-9}$           |
| T1469  | K80                | $2.75 \times 10^{-10}$          |
| T151   | HKY                | $1.09 \times 10^{-9}$           |
| T1364  | F81                | $7.08 \times 10^{-10}$          |
| T2609  | GTR + I            | $1.54 \times 10^{-9}$           |
| T2659  | HKY + I            | $7.46 \times 10^{-10}$          |
| T1251  | F81                | $1.60 \times 10^{-9}$           |
| T24894 | HKY                | $1.39 \times 10^{-9}$           |
| T2041  | F81 + I            | $1.33 \times 10^{-9}$           |
| T2294  | K80                | $9.48 \times 10^{-10}$          |
| T2984  | TIM + I            | $1.74 \times 10^{-9}$           |
| T10604 | HKY                | $6.17 \times 10^{-10}$          |
| T812   | TrN                | $1.13 \times 10^{-9}$           |
| T2920  | TVM                | $1.12 \times 10^{-9}$           |
| T2012  | TVM                | $7.25 \times 10^{-10}$          |
| T784   | K81uf + I          | $1.76 \times 10^{-9}$           |
| T787   | K81uf              | $1.03 \times 10^{-9}$           |

| Locus   | Evolutionary model | Mutation rate (per site per yr) |
|---------|--------------------|---------------------------------|
| T813    | K81uf              | $7.22 \times 10^{-10}$          |
| T2085   | TVMef + I          | $1.05 \times 10^{-10}$          |
| T2064   | TrN                | $4.11 \times 10^{-10}$          |
| T2352   | TrN + I            | $1.01 \times 10^{-10}$          |
| T2560   | HKY                | $3.79 \times 10^{-10}$          |
| T1412   | HKY                | $9.16 \times 10^{-10}$          |
| T1419   | TrN + I            | $9.38 \times 10^{-10}$          |
| T1482   | TrN + I            | $1.25 \times 10^{-10}$          |
| T2963   | TrN                | $2.86 \times 10^{-10}$          |
| T2265   | HKY + I            | $9.49 \times 10^{-10}$          |
| T2266   | HKY                | $7.78 \times 10^{-10}$          |
| T2558   | HKY                | $8.44 \times 10^{-10}$          |
| T2906   | HKY                | $3.06 \times 10^{-10}$          |
| T2987   | JC                 | $9.17 \times 10^{-10}$          |
| T946    | HKY                | $1.26 \times 10^{-9}$           |
| T2988   | HKY                | $1.18 \times 10^{-9}$           |
| T866    | K81uf              | $1.37 \times 10^{-9}$           |
| T1506   | F81                | $4.46 \times 10^{-10}$          |
| T2563   | HKY + I            | $1.31 \times 10^{-9}$           |
| T2018   | HKY                | $1.45 \times 10^{-9}$           |
| T2924   | HKY                | $1.62 \times 10^{-9}$           |
| T1386   | TrN                | $1.74 \times 10^{-9}$           |
| T864    | HKY                | $1.59 \times 10^{-9}$           |
| Average | -                  | $1.10 \times 10^{-9}$           |

Mutation rates were estimated from DNA sequences inferred with PHASE 2.0 [Stephens M, Smith NJ, Donnelly P (2001) *Am J Hum Genet* 68:978-989] and an expectation maximization algorithm [Excoffier L, Slatkin M (1995) *Mol Biol Evol* 12:921-927], two phasing methods shown as being accurate [Marchini J, Cutler D, Patterson N, Stephens M, Eskin E, Halperin E, Lin S, Qin ZS, Munro HM, Abecasis G R,

*et al.* (2006) *Am J Hum Genet* 78:437-450]. Whenever the two phasing methods resulted in different estimates (which occurred for 15 human and 16 chimpanzee loci) the method suggesting the smallest number of different haplotypes was preferred. Human and chimpanzee haplotypes were then aligned, and the best sequence evolutionary model was selected by using ModelTest [Posada D, Crandall KA (1998) *Bioinformatics* 14:817-818]. The mutation rate for each locus was estimated by using the average genetic distance between human and chimpanzee haplotypes under the most likely evolutionary model and by assuming a generation time of 25 years and a divergence time of 6 million years [Haile-Selassie Y, Suwa G, White TD (2004) *Science* 303:1503-1505] between the two species. The full names, references, and parameters for the evolutionary models can be found in the ModelTest manual (<http://darwin.uvigo.es/software/modeltest.html>).
