# Supplementary material
Source: PubMed Central journal article supplement (PMC2077041)
Supplement: pnas_0708280104_13.pdf [file pnas_0708280104_13.pdf]

**Table 7. Prior distributions for the parameters of the tested evolutionary models**

| Parameter                             | Model                 |                       |                  |                  |                       |                       |                            |                       | Values |                 | Distribution |
|---------------------------------------|-----------------------|-----------------------|------------------|------------------|-----------------------|-----------------------|----------------------------|-----------------------|--------|-----------------|--------------|
|                                       | A<br>F<br>R<br>I<br>G | A<br>F<br>R<br>E<br>G | A<br>S<br>I<br>G | A<br>S<br>E<br>G | M<br>R<br>E<br>1<br>S | M<br>R<br>E<br>2<br>S | M<br>R<br>E<br>B<br>I<br>G | M<br>R<br>E<br>B<br>E | Min.   | Max.            |              |
| Effective population sizes            |                       |                       |                  |                  |                       |                       |                            |                       |        |                 |              |
| Current size in Africa $N_{AF}$       | X                     |                       | X                |                  |                       | X                     | X                          |                       | 5,000  | $10^6$          | Log-uniform  |
| Current size in Asia $N_{AS}$         | X                     |                       | X                |                  |                       | X                     | X                          |                       | 1,000  | $10^5$          | Log-uniform  |
| Current size in America $N_{AM}$      | X                     |                       | X                |                  |                       | X                     | X                          |                       | 1,000  | $10^5$          | Log-uniform  |
| Current size in Africa $N_{AF}^*$     |                       | X                     |                  | X                |                       |                       |                            | X                     | 5,000  | $5 \times 10^6$ | Log-uniform  |
| Current size in Asia $N_{AS}^*$       |                       | X                     |                  | X                |                       |                       |                            | X                     | 1,000  | $10^6$          | Log-uniform  |
| Current size in America $N_{AM}^*$    |                       | X                     |                  | X                |                       |                       |                            | X                     | 1,000  | $10^6$          | Log-uniform  |
| Current size in Africa $N_{AF}^{**}$  |                       |                       |                  |                  | X                     |                       |                            |                       | 100    | $10^6$          | Log-uniform  |
| Current size in Asia $N_{AS}^{**}$    |                       |                       |                  |                  | X                     |                       |                            |                       | 100    | $10^5$          | Log-uniform  |
| Current size in America $N_{AM}^{**}$ |                       |                       |                  |                  | X                     |                       |                            |                       | 100    | $10^5$          | Log-uniform  |
| Archaic size in Africa $N_{A-AF}$     | X                     | X                     | X                | X                |                       |                       |                            |                       | 1,000  | $10^5$          | Log-uniform  |

|                                                         |   |   |   |   |   |   |   |   |           |           |             |
|---------------------------------------------------------|---|---|---|---|---|---|---|---|-----------|-----------|-------------|
| Archaic size in Africa $N_{A-AF}^*$                     |   |   |   |   |   | X | X | X | 100       | $10^4$    | Log-uniform |
| Archaic size in Asia $N_{A-AS}$                         | X | X | X | X |   | X | X | X | 100       | $10^4$    | Log-uniform |
| Size during the peopling of the Americas $N_{bAM}$      | X | X | X | X | X | X | X | X | 2         | 5,000     | Uniform     |
| Size during modern out-of-Africa $N_{bAS}$              | X | X | X | X |   |   |   |   | 2         | 5,000     | Uniform     |
| Size during modern human speciation $N_{bMH}$           | X | X | X | X |   |   | X | X | 2         | 5,000     | Uniform     |
| Size during <i>H. erectus</i> out-of-Africa $N_{bA-AS}$ |   |   | X | X | X | X | X | X | 2         | 5,000     | Uniform     |
| Forward in time migration rates                         |   |   |   |   |   |   |   |   |           |           |             |
| Current migration rate from Africa to Asia $M_1$        |   |   |   |   | X | X | X | X | $10^{-7}$ | $10^{-3}$ | Log-uniform |
| Current migration rate from Asia to Africa $M_2$        |   |   |   |   | X | X | X | X | $10^{-7}$ | $10^{-3}$ | Log-uniform |
| Ancient migration rate from Africa to Asia $M_3$        |   |   |   |   |   | X | X | X | $10^{-7}$ | $10^{-3}$ | Log-uniform |
| Ancient migration rate from Asia to Africa $M_4$        |   |   |   |   |   | X | X | X | $10^{-7}$ | $10^{-3}$ | Log-uniform |
| Timing                                                  |   |   |   |   |   |   |   |   |           |           |             |
| Time for the peopling of the Americas $T_{AM}$          | X | X | X | X | X | X | X | X | 300       | 1,600     | Uniform     |
| Time for modern out-of-Africa $T_{AS}$                  | X | X | X | X |   |   |   |   | 1,600     | 4,000     | Uniform     |
| Time for population increase in Asia $T_{AS}^*$         |   |   |   |   |   | X | X | X | 1,600     | 4,000     | Uniform     |

|                                                                               |   |   |   |   |   |   |   |   |                   |                 |         |
|-------------------------------------------------------------------------------|---|---|---|---|---|---|---|---|-------------------|-----------------|---------|
| Time for modern speciation<br>$T_{MH}$                                        | X | X | X | X |   |   |   |   | 4,000             | 8,000           | Uniform |
| Time for modern speciation<br>$T_{MH}^*$                                      |   |   |   |   |   | X | X | X | 1,600             | 8,000           | Uniform |
| Time for <i>H. erectus</i> out-of-Africa<br>$T_{A-AS}$                        |   |   | X | X | X | X | X | X | $3.2 \times 10^4$ | $4 \times 10^4$ | Uniform |
| Duration of the peopling of the Americas bottleneck<br>$\Delta b_{AM}$        | X | X | X | X | X | X | X | X | 1                 | 50              | Uniform |
| Duration of the modern out-of-Africa bottleneck<br>$\Delta b_{AS}$            | X | X | X | X |   |   |   |   | 1                 | 50              | Uniform |
| Duration of the modern speciation bottleneck<br>$\Delta b_{MH}$               | X | X | X | X |   |   |   |   | 1                 | 500             | Uniform |
| Duration of the modern speciation bottleneck<br>$\Delta b_{MH}^*$             |   |   |   |   |   |   | X | X | 1                 | 50              | Uniform |
| Duration of the <i>H. erectus</i> out-of-Africa bottleneck<br>$\Delta b_{HE}$ |   |   | X | X | X | X | X | X | 1                 | 50              | Uniform |
| Admixture level                                                               |   |   |   |   |   |   |   |   |                   |                 |         |
| Proportion of archaic genes in current Asian population<br>ADM                |   |   | X | X |   |   |   |   | 0.00              | 1.00            | Uniform |

Population sizes are in number of chromosomes, Times are in number of generations.

We used uniform priors for parameters with a search space made up of discrete values or of continuous values with one order-of-magnitude between the smallest and largest values, or for parameters where no prior information is available (e.g. the timing of all events, bottleneck population sizes, duration of the bottlenecks, and the fraction of the archaic chromosomes to invade the “modern” Asian population). We used a log-uniform distribution for parameters with a larger search space, such as the current population size, migration rates, and the “archaic” population sizes in Africa and Asia. This strategy implies that the sampling for these parameters is denser for smaller values, which seems reasonable since most studies suggest population sizes of a few thousand individuals

[Takahata N, Lee SH, Satta Y (2001) *Mol Biol Evol* 18:172-183], or low recurrent migration between continents [Rosenberg NA, Mahajan S, Ramachandran S, Zhao C, Pritchard JK, Feldman MW (2005) *PLoS Genet* 1:e70]. Relevant parameters for a given model are indicated with “X.”
