# Supplementary material
Source: PubMed Central journal article supplement (PMC2077041)
Supplement: pnas_0708280104_14.pdf [file pnas_0708280104_14.pdf]

**Table 8. Summary of the genetic diversity found at the 50 studied loci**

| Locus | $L$ | Sample size (individuals) |      |         |       | Number of segregating sites ( $S$ ) |      |         |       | $\pi$ , % |       |               |        | Tajima's $D$ |        |         |        | $F_{ST}$      |                  |                |       |
|-------|-----|---------------------------|------|---------|-------|-------------------------------------|------|---------|-------|-----------|-------|---------------|--------|--------------|--------|---------|--------|---------------|------------------|----------------|-------|
|       |     | Africa                    | Asia | America | Total | Africa                              | Asia | America | Total | Africa    | Asia  | America       | Total  | Africa       | Asia   | America | Total  | Africa × Asia | Africa × America | Asia × America | Total |
| T2557 | 431 | 10                        | 8    | 12      | 4     | 3                                   | 2    | 3       | 0.305 | 0.130     | 0.219 | 1.485         | -0.189 | 0.434        | 0.068  | -0.019  | 0.153  | 0.068         | -0.019           | 0.073          |       |
| T2191 | 405 | 10                        | 8    | 12      | 1     | 1                                   | 0    | 1       | 0.047 | 0.000     | 0.000 | -0.592        | NP     | NP           | 0.066  | NP      | 0.037  | 0.066         | NP               | 0.053          |       |
| T2568 | 439 | 10                        | 8    | 12      | 3     | 2                                   | 2    | 3       | 0.061 | 0.103     | 0.157 | -0.086        | -0.649 | 0.627        | 0.148  | -0.016  | 0.107  | 0.148         | -0.016           | 0.082          |       |
| T1636 | 506 | 10                        | 8    | 12      | 8     | 0                                   | 0    | 8       | 0.583 | 0.000     | 0.000 | 1.035         | NP     | NP           | 0.288  | 0.000   | 0.235  | 0.288         | 0.000            | 0.266          |       |
| T2020 | 488 | 10                        | 8    | 12      | 1     | 1                                   | 1    | 1       | 0.039 | 0.082     | 0.095 | -0.592        | 0.650  | 1.232        | 0.103  | -0.038  | 0.023  | 0.103         | -0.038           | 0.034          |       |
| T1584 | 563 | 10                        | 8    | 11      | 1     | 0                                   | 0    | 1       | 0.018 | 0.000     | 0.000 | -1.164        | NP     | NP           | 0.005  | NP      | -0.012 | 0.005         | NP               | -0.003         |       |
| T2019 | 442 | 10                        | 8    | 12      | 1     | 1                                   | 1    | 1       | 0.043 | 0.053     | 0.105 | -0.592        | -0.448 | 1.232        | 0.474  | 0.424   | -0.056 | 0.474         | 0.424            | 0.402          |       |
| T2986 | 439 | 10                        | 8    | 11      | 1     | 1                                   | 0    | 1       | 0.023 | 0.053     | 0.000 | -1.164        | -0.448 | NP           | 0.005  | 0.096   | -0.021 | 0.005         | 0.096            | 0.024          |       |
| T953  | 644 | 10                        | 8    | 12      | 0     | 0                                   | 0    | 0       | 0.000 | 0.000     | 0.000 | NP            | NP     | NP           | NP     | NP      | NP     | NP            | NP               | NP             |       |
| T2021 | 477 | 10                        | 8    | 11      | 5     | 2                                   | 1    | 5       | 0.156 | 0.159     | 0.106 | -0.989        | 0.661  | <b>1.471</b> | 0.092  | 0.010   | -0.001 | 0.092         | 0.010            | 0.039          |       |
| T2472 | 416 | 10                        | 8    | 11      | 1     | 0                                   | 0    | 1       | 0.065 | 0.000     | 0.000 | -0.086        | NP     | NP           | 0.114  | NP      | 0.086  | 0.114         | NP               | 0.102          |       |
| T1469 | 442 | 10                        | 8    | 12      | 2     | 1                                   | 1    | 2       | 0.043 | 0.074     | 0.078 | -0.592        | 0.156  | 0.480        | 0.130  | -0.054  | 0.111  | 0.130         | -0.054           | 0.063          |       |
| T151  | 412 | 10                        | 8    | 12      | 2     | 1                                   | 1    | 2       | 0.089 | 0.111     | 0.095 | -0.812        | 1.034  | 0.776        | -0.013 | -0.045  | 0.014  | -0.013        | -0.045           | -0.016         |       |
| T1364 | 417 | 10                        | 8    | 12      | 0     | 0                                   | 0    | 0       | 0.000 | 0.000     | 0.000 | NP            | NP     | NP           | NP     | NP      | NP     | NP            | NP               | NP             |       |
| T2609 | 452 | 10                        | 8    | 12      | 2     | 0                                   | 0    | 2       | 0.064 | 0.000     | 0.000 | -1.141        | NP     | NP           | 0.047  | NP      | 0.021  | 0.047         | NP               | 0.036          |       |
| T2659 | 455 | 10                        | 8    | 12      | 3     | 2                                   | 1    | 3       | 0.044 | 0.028     | 0.102 | <b>-1.513</b> | -1.162 | 1.232        | 0.226  | 0.145   | -0.003 | 0.226         | 0.145            | 0.170          |       |

|        |     |    |   |    |   |   |   |   |       |       |       |               |               |              |    |        |        |        |        |
|--------|-----|----|---|----|---|---|---|---|-------|-------|-------|---------------|---------------|--------------|----|--------|--------|--------|--------|
| T1251  | 529 | 10 | 8 | 12 | 6 | 0 | 0 | 0 | 6     | 0.211 | 0.000 | 0.000         | -1.084        | NP           | NP | 0.053  | 0.085  | NP     | 0.071  |
| T24894 | 476 | 10 | 8 | 12 | 3 | 0 | 0 | 0 | 3     | 0.063 | 0.000 | 0.000         | <b>-1.723</b> | NP           | NP | -0.012 | 0.009  | NP     | -0.001 |
| T2041  | 429 | 10 | 8 | 9  | 0 | 0 | 0 | 0 | 0     | 0.000 | 0.000 | 0.000         | NP            | NP           | NP | NP     | NP     | NP     | NP     |
| T2294  | 700 | 10 | 8 | 12 | 5 | 5 | 4 | 7 | 0.123 | 0.199 | 0.245 | -1.197        | -0.252        | <b>1.641</b> | NP | 0.026  | 0.309  | 0.124  | 0.193  |
| T2984  | 478 | 10 | 8 | 12 | 3 | 0 | 0 | 3 | 0.098 | 0.000 | 0.000 | -1.191        | NP            | NP           | NP | 0.047  | 0.077  | NP     | 0.064  |
| T10604 | 511 | 10 | 8 | 12 | 2 | 2 | 0 | 3 | 0.118 | 0.088 | 0.000 | 0.173         | -0.649        | NP           | NP | 0.038  | 0.354  | 0.144  | 0.192  |
| T812   | 653 | 10 | 8 | 11 | 2 | 1 | 0 | 3 | 0.031 | 0.019 | 0.000 | <b>-1.513</b> | -1.162        | NP           | NP | -0.003 | 0.005  | 0.021  | 0.004  |
| T2920  | 508 | 10 | 8 | 9  | 3 | 2 | 2 | 3 | 0.219 | 0.092 | 0.202 | 0.837         | -0.578        | NP           | NP | 0.408  | -0.029 | 0.330  | 0.245  |
| T2012  | 525 | 10 | 8 | 12 | 0 | 0 | 0 | 0 | 0.000 | 0.000 | 0.000 | NP            | NP            | NP           | NP | NP     | NP     | NP     | NP     |
| T784   | 541 | 10 | 8 | 12 | 3 | 4 | 1 | 6 | 0.110 | 0.154 | 0.094 | -0.792        | -0.966        | NP           | NP | 0.568  | 0.617  | -0.117 | 0.492  |
| T787   | 442 | 10 | 8 | 12 | 1 | 1 | 1 | 1 | 0.076 | 0.113 | 0.115 | 0.352         | 1.309         | <b>1.505</b> | NP | 0.018  | 0.060  | -0.051 | 0.011  |
| T813   | 528 | 10 | 8 | 10 | 1 | 1 | 1 | 1 | 0.099 | 0.101 | 0.100 | <b>1.531</b>  | <b>1.529</b>  | <b>1.505</b> | NP | -0.054 | -0.047 | -0.060 | -0.053 |
| T2085  | 577 | 10 | 8 | 11 | 3 | 0 | 0 | 3 | 0.263 | 0.000 | 0.000 | <b>2.117</b>  | NP            | NP           | NP | 0.338  | 0.382  | NP     | 0.365  |
| T2064  | 522 | 10 | 8 | 11 | 0 | 0 | 2 | 2 | 0.000 | 0.000 | 0.077 | NP            | NP            | NP           | NP | 0.000  | 0.106  | 0.087  | 0.100  |
| T2352  | 558 | 10 | 8 | 12 | 4 | 1 | 1 | 4 | 0.223 | 0.058 | 0.062 | 0.294         | 0.156         | NP           | NP | 0.074  | 0.089  | -0.054 | 0.062  |
| T2560  | 499 | 10 | 8 | 12 | 2 | 1 | 0 | 3 | 0.109 | 0.25  | 0.000 | -0.090        | -1.162        | NP           | NP | 0.176  | 0.249  | 0.026  | 0.202  |
| T1412  | 543 | 10 | 8 | 11 | 4 | 2 | 2 | 4 | 0.207 | 0.103 | 0.113 | -0.016        | -0.189        | NP           | NP | 0.120  | 0.110  | -0.054 | 0.079  |
| T1419  | 452 | 10 | 8 | 12 | 2 | 0 | 0 | 2 | 0.064 | 0.000 | 0.000 | -1.141        | NP            | NP           | NP | 0.021  | 0.047  | NP     | 0.036  |
| T1482  | 479 | 10 | 8 | 11 | 2 | 2 | 1 | 3 | 0.110 | 0.075 | 0.065 | -0.156        | -1.038        | NP           | NP | -0.003 | -0.007 | -0.034 | -0.023 |

|         |        |    |   |    |     |    |    |     |       |       |       |        |               |              |              |        |        |        |        |
|---------|--------|----|---|----|-----|----|----|-----|-------|-------|-------|--------|---------------|--------------|--------------|--------|--------|--------|--------|
| T2963   | 432    | 10 | 8 | 11 | 3   | 0  | 0  | 0   | 3     | 0.069 | 0.000 | 0.000  | <b>-1.723</b> | NP           | NP           | -0.012 | 0.005  | NP     | -0.003 |
| T2265   | 453    | 10 | 8 | 12 | 3   | 0  | 0  | 0   | 3     | 0.086 | 0.000 | 0.000  | -1.441        | NP           | NP           | 0.013  | 0.038  | NP     | 0.027  |
| T2266   | 477    | 10 | 8 | 12 | 2   | 0  | 0  | 0   | 2     | 0.127 | 0.000 | 0.000  | 0.173         | NP           | NP           | 0.298  | 0.354  | NP     | 0.330  |
| T2558   | 509    | 10 | 8 | 12 | 4   | 2  | 2  | 0   | 4     | 0.236 | 0.197 | 0.154  | 0.186         | <b>1.687</b> | 1.014        | 0.042  | 0.011  | -0.016 | 0.013  |
| T2906   | 585    | 10 | 8 | 12 | 1   | 0  | 0  | 0   | 1     | 0.082 | 0.000 | 0.000  | 1.262         | NP           | NP           | 0.286  | 0.342  | NP     | 0.319  |
| T2987   | 316    | 10 | 8 | 10 | 2   | 1  | 1  | 1   | 2     | 0.157 | 0.166 | 0.060  | -0.287        | <b>1.474</b> | -0.592       | 0.123  | 0.544  | 0.220  | 0.346  |
| T946    | 450    | 10 | 8 | 11 | 1   | 0  | 0  | 0   | 1     | 0.042 | 0.000 | 0.000  | -0.592        | NP           | NP           | 0.037  | 0.060  | NP     | 0.050  |
| T2988   | 581    | 10 | 8 | 12 | 5   | 3  | 1  | 1   | 6     | 0.280 | 0.176 | 0.067  | 0.471         | 0.388        | 0.776        | 0.024  | 0.134  | 0.070  | 0.080  |
| T866    | 349    | 10 | 8 | 12 | 1   | 1  | 0  | 0   | 2     | 0.029 | 0.067 | 0.000  | -1.164        | -0.448       | NP           | 0.055  | 0.009  | 0.105  | 0.061  |
| T1506   | 476    | 10 | 8 | 12 | 0   | 1  | 1  | 1   | 1     | 0.000 | 0.026 | 0.018  | NP            | -1.162       | -1.159       | 0.014  | -0.008 | -0.050 | -0.023 |
| T2563   | 526    | 10 | 8 | 10 | 1   | 0  | 0  | 0   | 1     | 0.036 | 0.000 | 0.000  | -0.592        | NP           | NP           | 0.037  | 0.053  | NP     | 0.046  |
| T2018   | 522    | 10 | 8 | 11 | 2   | 1  | 0  | 0   | 3     | 0.104 | 0.024 | 0.000  | -0.090        | -1.162       | NP           | 0.176  | 0.238  | 0.021  | 0.196  |
| T2924   | 460    | 10 | 8 | 10 | 3   | 3  | 3  | 3   | 3     | 0.259 | 0.286 | 0.248  | 1.086         | 1.323        | 0.936        | -0.017 | 0.037  | 0.065  | 0.029  |
| T1386   | 418    | 10 | 8 | 11 | 4   | 2  | 1  | 1   | 5     | 0.286 | 0.060 | 0.121  | 0.173         | -1.498       | <b>1.471</b> | 0.117  | 0.028  | 0.204  | 0.096  |
| T864    | 493    | 10 | 8 | 12 | 7   | 3  | 1  | 1   | 8     | 0.246 | 0.213 | 0.070  | -1.271        | 0.468        | 0.480        | 0.027  | 0.125  | 0.122  | 0.088  |
| Overall | 24,425 | -  | - | -  | 114 | 51 | 36 | 137 | 0.061 | 0.115 | 0.055 | -0.452 | -0.141        | 0.833        | 0.833        | 0.139  | 0.182  | 0.075  | 0.139  |

The four monomorphic loci are shown in italics.  $L$ , length of the DNA sequence analyzed for all individuals.  $\pi$ , nucleotide diversity; Tajima's  $D$  values where  $P$  values are  $<0.05$  are shown in bold; NP, nonpolymorphic loci.
