# Supplementary material
Source: PubMed Central journal article supplement (PMC2077041)

Density

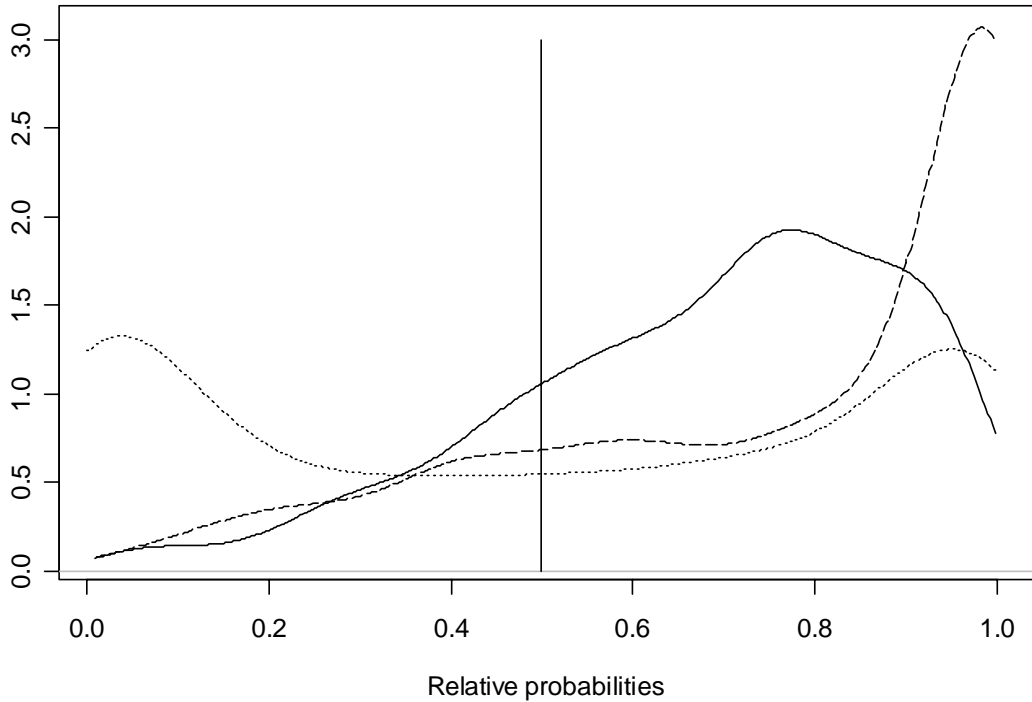

Supplement: pnas_0708280104_1.pdf [file pnas_0708280104_1.pdf]

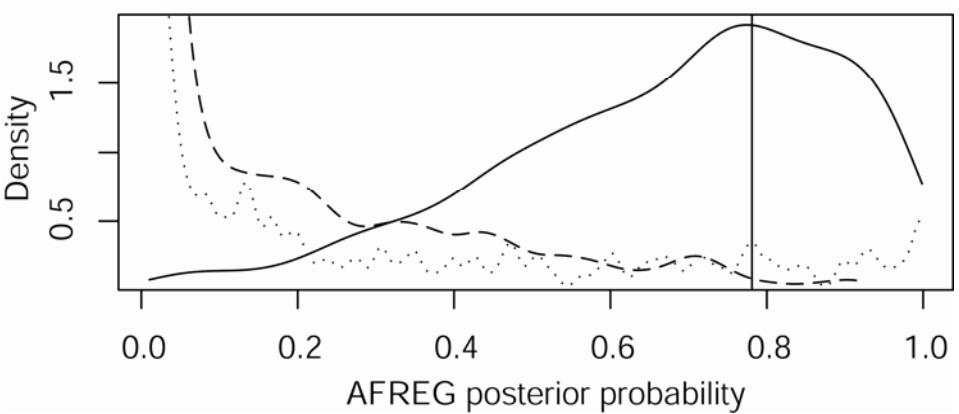

Supplement: pnas_0708280104_2.pdf [file pnas_0708280104_2.pdf]

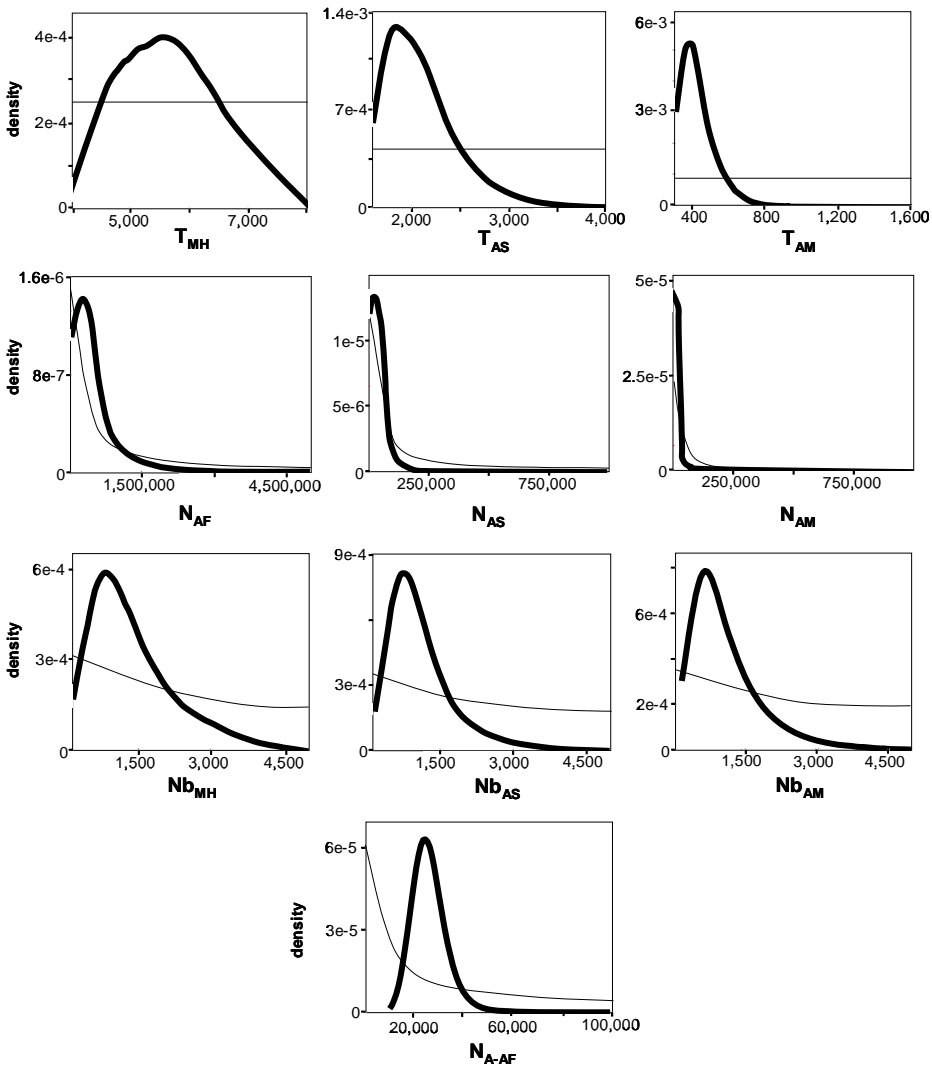

Supplement: pnas_0708280104_3.pdf [file pnas_0708280104_3.pdf]

# Nuclear data

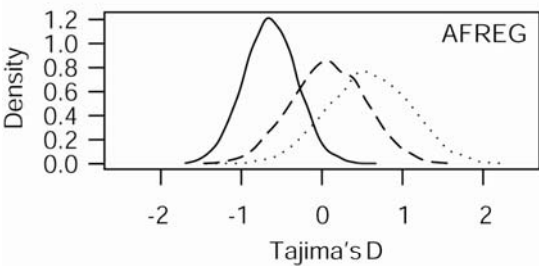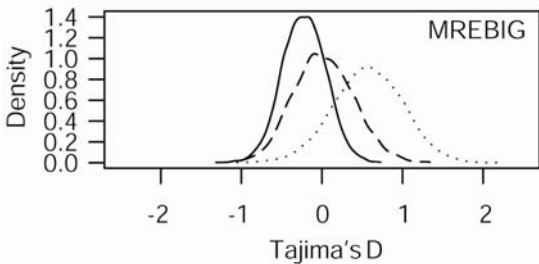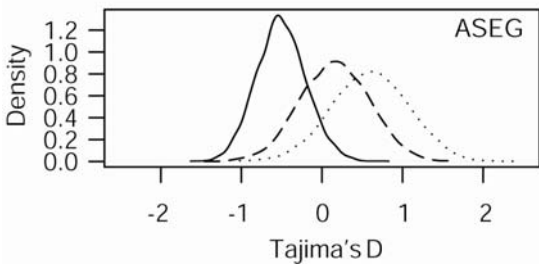

# mtDNA and Y chrom.

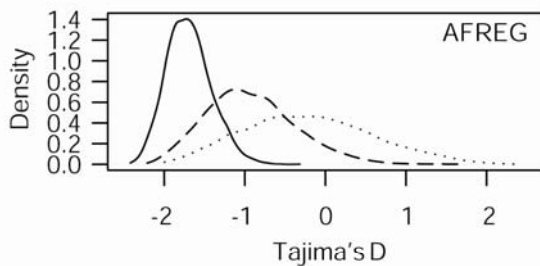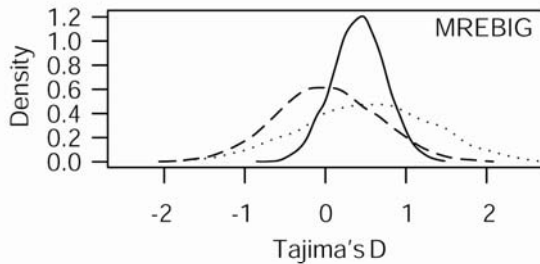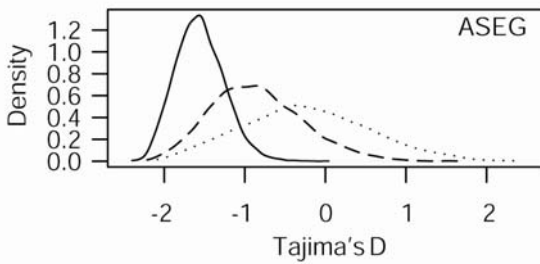

Supplement: pnas_0708280104_4.pdf [file pnas_0708280104_4.pdf]

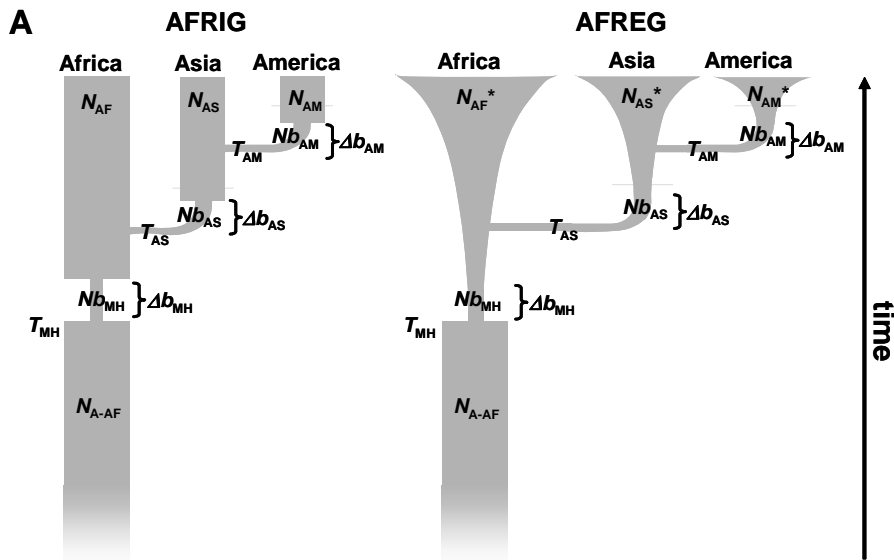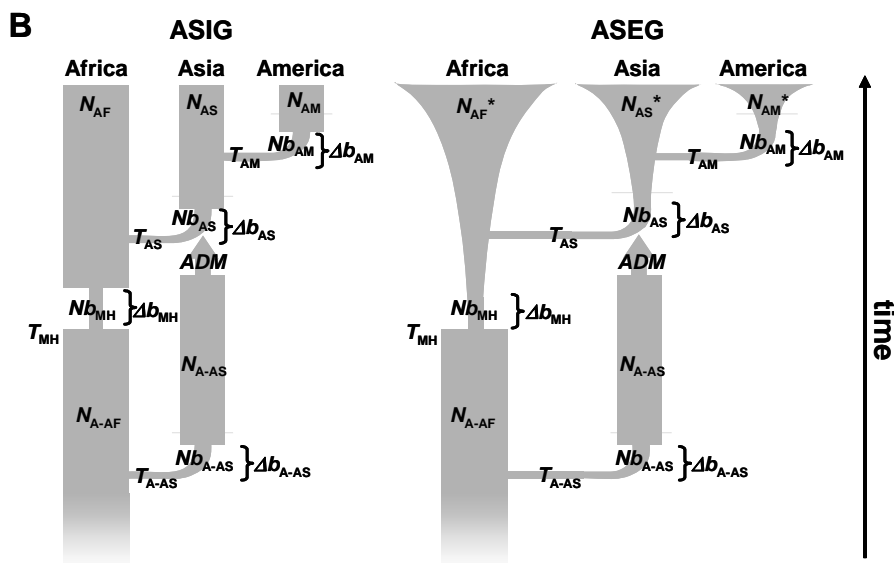

Supplement: pnas_0708280104_5.pdf [file pnas_0708280104_5.pdf]

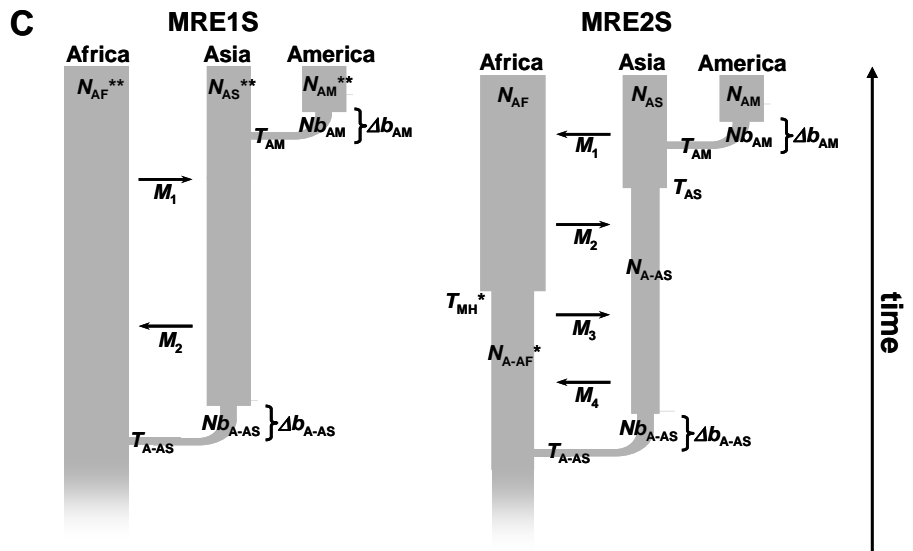

**MREBIG**

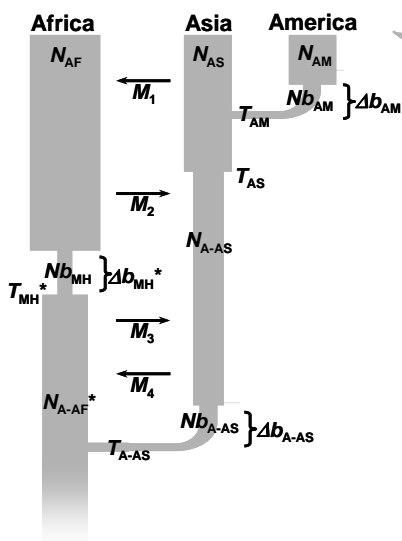

**MREBEG**

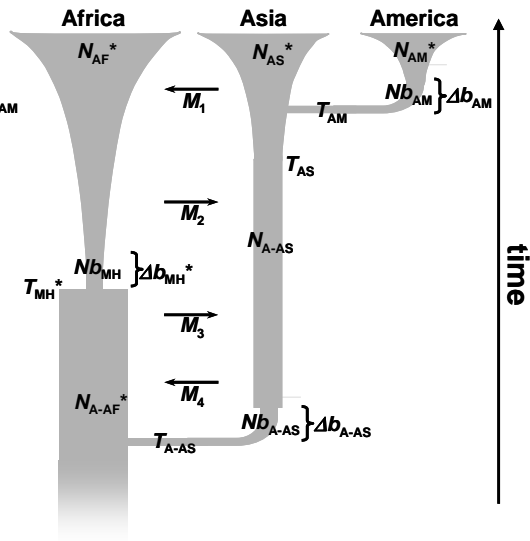

Supplement: pnas_0708280104_6.pdf [file pnas_0708280104_6.pdf]

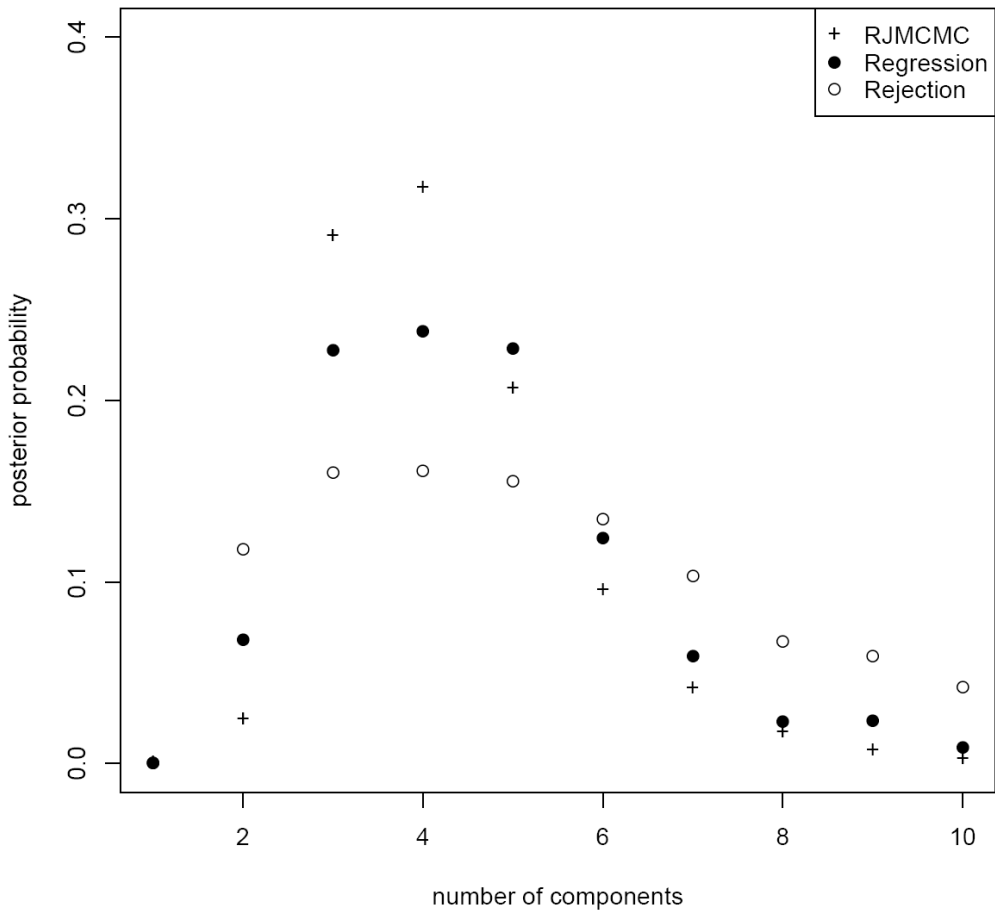

Supplement: pnas_0708280104_7.pdf [file pnas_0708280104_7.pdf]
